# Supplementary material
Source: PubMed Central journal article supplement (PMC5850799)
Supplement: dex341suppl_table1.pdf [file dex341suppl_table1.pdf]

**Supplementary Table S1** Pearson correlation coefficients for ambient levels of air pollutants ( $n = 500$ ); the LIFE Study (2005–2009).

|                                                                            | SO <sub>2</sub> | O <sub>3</sub> | NO <sub>x</sub> | NO <sub>2</sub> | CO    | PM <sub>10</sub> | PM <sub>2.5</sub> | AEC  | ANH <sub>4</sub> | ANO <sub>3</sub> | AOC  | ASO <sub>4</sub> |
|----------------------------------------------------------------------------|-----------------|----------------|-----------------|-----------------|-------|------------------|-------------------|------|------------------|------------------|------|------------------|
| Day average 5 days prior to ovulation in first observed cycle <sup>a</sup> |                 |                |                 |                 |       |                  |                   |      |                  |                  |      |                  |
| SO <sub>2</sub>                                                            | 1               |                |                 |                 |       |                  |                   |      |                  |                  |      |                  |
| O <sub>3</sub>                                                             | -0.09           | 1              |                 |                 |       |                  |                   |      |                  |                  |      |                  |
| NO <sub>x</sub>                                                            | 0.29            | -0.30          | 1               |                 |       |                  |                   |      |                  |                  |      |                  |
| NO <sub>2</sub>                                                            | 0.37            | -0.28          | 0.85            | 1               |       |                  |                   |      |                  |                  |      |                  |
| CO                                                                         | 0.19            | -0.15          | 0.78            | 0.65            | 1     |                  |                   |      |                  |                  |      |                  |
| PM <sub>10</sub>                                                           | -0.05           | -0.11          | 0.29            | 0.29            | 0.36  | 1                |                   |      |                  |                  |      |                  |
| PM <sub>2.5</sub>                                                          | 0.14            | -0.03          | 0.37            | 0.39            | 0.44  | 0.61             | 1                 |      |                  |                  |      |                  |
| AEC                                                                        | 0.32            | -0.14          | 0.55            | 0.59            | 0.39  | 0.26             | 0.50              | 1    |                  |                  |      |                  |
| ANH <sub>4</sub>                                                           | 0.05            | 0.16           | 0.18            | 0.22            | 0.16  | 0.29             | 0.61              | 0.42 | 1                |                  |      |                  |
| ANO <sub>3</sub>                                                           | 0.07            | -0.05          | 0.27            | 0.19            | 0.08  | -0.03            | 0.27              | 0.33 | 0.50             | 1                |      |                  |
| AOC                                                                        | 0.16            | 0.10           | 0.43            | 0.44            | 0.38  | 0.22             | 0.43              | 0.63 | 0.34             | 0.24             | 1    |                  |
| ASO <sub>4</sub>                                                           | 0.00            | 0.22           | -0.01           | 0.09            | 0.09  | 0.38             | 0.59              | 0.24 | 0.84             | 0.06             | 0.19 | 1                |
| Cycle average for first observed cycle                                     |                 |                |                 |                 |       |                  |                   |      |                  |                  |      |                  |
| SO <sub>2</sub>                                                            | 1               |                |                 |                 |       |                  |                   |      |                  |                  |      |                  |
| O <sub>3</sub>                                                             | -0.17           | 1              |                 |                 |       |                  |                   |      |                  |                  |      |                  |
| NO <sub>x</sub>                                                            | 0.42            | -0.58          | 1               |                 |       |                  |                   |      |                  |                  |      |                  |
| NO <sub>2</sub>                                                            | 0.48            | -0.50          | 0.94            | 1               |       |                  |                   |      |                  |                  |      |                  |
| CO                                                                         | 0.28            | -0.38          | 0.69            | 0.66            | 1     |                  |                   |      |                  |                  |      |                  |
| PM <sub>10</sub>                                                           | -0.20           | -0.17          | 0.22            | 0.25            | 0.42  | 1                |                   |      |                  |                  |      |                  |
| PM <sub>2.5</sub>                                                          | 0.18            | -0.13          | 0.36            | 0.42            | 0.42  | 0.41             | 1                 |      |                  |                  |      |                  |
| AEC                                                                        | 0.51            | -0.18          | 0.51            | 0.46            | 0.27  | -0.12            | 0.46              | 1    |                  |                  |      |                  |
| ANH <sub>4</sub>                                                           | 0.10            | 0.18           | 0.13            | 0.15            | -0.01 | -0.001           | 0.46              | 0.36 | 1                |                  |      |                  |
| ANO <sub>3</sub>                                                           | 0.11            | -0.06          | 0.17            | 0.09            | -0.21 | -0.43            | 0.07              | 0.29 | 0.60             | 1                |      |                  |
| AOC                                                                        | 0.18            | -0.04          | 0.54            | 0.45            | 0.45  | 0.12             | 0.44              | 0.66 | 0.26             | 0.03             | 1    |                  |
| ASO <sub>4</sub>                                                           | -0.07           | 0.32           | -0.09           | 0.03            | 0.10  | 0.51             | 0.51              | 0.11 | 0.54             | -0.24            | 0.16 | 1                |

SO<sub>2</sub>, sulfur dioxide; O<sub>3</sub>, ozone; NO<sub>x</sub>, nitrogen oxides; NO<sub>2</sub>, nitrogen dioxide; CO, carbon monoxide; PM<sub>10</sub>, particulate matter <10 µg/m<sup>3</sup>; PM<sub>2.5</sub>, fine particulate matter <2.5 µg/m<sup>3</sup>; AEC, elemental carbon; ANH<sub>4</sub>, ammonium; ANO<sub>3</sub>, nitrate; AOC, organic compounds; ASO<sub>4</sub>, sulfate.

<sup>a</sup>Excludes 60 participants who achieved pregnancy or were censored at the end of the entry cycle (ovulation date not assessed).
