# Supplementary material
Source: PubMed Central journal article supplement (PMC5850799)
Supplement: dex341suppl_table2.pdf [file dex341suppl_table2.pdf]

**Supplementary Table SII Association of an interquartile increase in criteria air pollutants and fecundability, unadjusted; the LIFE Study (2005–2009).**

| Days from ovulation                                | SO <sub>2</sub> |            | O <sub>3</sub> |            | NO <sub>x</sub> |            | NO <sub>2</sub> |            | CO   |            | PM <sub>10</sub> |            | PM <sub>2.5</sub> |            |
|----------------------------------------------------|-----------------|------------|----------------|------------|-----------------|------------|-----------------|------------|------|------------|------------------|------------|-------------------|------------|
|                                                    | FOR             | 95% CI     | FOR            | 95% CI     | FOR             | 95% CI     | FOR             | 95% CI     | FOR  | 95% CI     | FOR              | 95% CI     | FOR               | 95% CI     |
| Time-varying cycle averages (n = 500) <sup>a</sup> |                 |            |                |            |                 |            |                 |            |      |            |                  |            |                   |            |
| Prior cycle                                        | 0.94            | 0.82, 1.08 | 1.06           | 0.88, 1.27 | 0.89            | 0.75, 1.06 | 1.04            | 0.92, 1.18 | 1.03 | 0.90, 1.17 | 1.14             | 0.96, 1.36 | 1.02              | 0.86, 1.20 |
| Proliferative phase                                | 0.97            | 0.85, 1.10 | 1.11           | 0.95, 1.31 | 0.91            | 0.78, 1.06 | 1.02            | 0.90, 1.14 | 1.02 | 0.90, 1.15 | 1.11             | 0.96, 1.29 | 0.99              | 0.87, 1.12 |
| Days from ovulation (n = 440) <sup>b</sup>         |                 |            |                |            |                 |            |                 |            |      |            |                  |            |                   |            |
| -5                                                 | 0.97            | 0.88, 1.06 | 0.88           | 0.78, 0.99 | 1.04            | 0.96, 1.13 | 1.01            | 0.91, 1.13 | 1.14 | 1.01, 1.28 | 1.10             | 0.97, 1.26 | 1.03              | 0.94, 1.12 |
| -4                                                 | 0.96            | 0.87, 1.06 | 0.97           | 0.86, 1.09 | 1.04            | 0.95, 1.13 | 1.01            | 0.91, 1.13 | 1.12 | 0.99, 1.27 | 1.08             | 0.95, 1.24 | 1.03              | 0.95, 1.12 |
| -3                                                 | 1.00            | 0.91, 1.09 | 1.01           | 0.89, 1.15 | 0.96            | 0.88, 1.05 | 0.98            | 0.89, 1.09 | 1.01 | 0.89, 1.14 | 1.08             | 0.95, 1.23 | 1.02              | 0.94, 1.11 |
| -2                                                 | 1.00            | 0.91, 1.09 | 0.93           | 0.82, 1.05 | 0.98            | 0.90, 1.08 | 1.00            | 0.90, 1.10 | 1.04 | 0.91, 1.17 | 1.09             | 0.96, 1.25 | 1.04              | 0.95, 1.13 |
| -1                                                 | 0.99            | 0.90, 1.08 | 0.86           | 0.76, 0.97 | 1.03            | 0.94, 1.13 | 0.99            | 0.89, 1.10 | 1.11 | 0.99, 1.24 | 1.12             | 0.98, 1.27 | 1.03              | 0.94, 1.12 |
| 0                                                  | 1.06            | 0.97, 1.16 | 0.86           | 0.76, 0.97 | 1.04            | 0.96, 1.13 | 1.04            | 0.95, 1.15 | 1.06 | 0.94, 1.19 | 1.09             | 0.96, 1.25 | 0.99              | 0.91, 1.08 |
| 1                                                  | 1.01            | 0.92, 1.12 | 0.95           | 0.84, 1.08 | 0.99            | 0.91, 1.08 | 0.98            | 0.88, 1.09 | 1.01 | 0.89, 1.15 | 1.14             | 1.00, 1.29 | 1.02              | 0.93, 1.11 |
| 2                                                  | 0.97            | 0.88, 1.06 | 0.90           | 0.80, 1.02 | 1.02            | 0.93, 1.11 | 0.98            | 0.88, 1.09 | 1.03 | 0.90, 1.17 | 1.15             | 1.01, 1.32 | 1.03              | 0.95, 1.13 |
| 3                                                  | 0.96            | 0.87, 1.06 | 0.91           | 0.80, 1.03 | 0.97            | 0.89, 1.06 | 0.94            | 0.85, 1.05 | 0.96 | 0.84, 1.08 | 1.08             | 0.95, 1.23 | 0.98              | 0.90, 1.06 |
| 4                                                  | 1.04            | 0.94, 1.14 | 0.92           | 0.81, 1.04 | 1.05            | 0.96, 1.13 | 1.04            | 0.94, 1.16 | 1.02 | 0.89, 1.16 | 1.15             | 1.01, 1.30 | 1.02              | 0.94, 1.11 |
| 5                                                  | 0.94            | 0.86, 1.03 | 0.95           | 0.84, 1.08 | 1.04            | 0.96, 1.14 | 1.07            | 0.96, 1.18 | 1.08 | 0.95, 1.23 | 1.19             | 1.05, 1.36 | 1.04              | 0.95, 1.13 |
| 6                                                  | 1.02            | 0.94, 1.12 | 0.99           | 0.88, 1.12 | 1.06            | 0.98, 1.14 | 1.06            | 0.96, 1.18 | 1.12 | 1.00, 1.26 | 1.20             | 1.06, 1.37 | 1.04              | 0.96, 1.14 |
| 7                                                  | 1.01            | 0.92, 1.10 | 0.95           | 0.84, 1.07 | 0.97            | 0.88, 1.07 | 0.98            | 0.88, 1.10 | 1.01 | 0.89, 1.14 | 1.11             | 0.97, 1.27 | 0.99              | 0.91, 1.08 |
| 8                                                  | 0.99            | 0.91, 1.08 | 0.95           | 0.84, 1.07 | 0.90            | 0.81, 1.00 | 0.91            | 0.81, 1.02 | 0.96 | 0.84, 1.10 | 1.08             | 0.95, 1.23 | 0.98              | 0.89, 1.07 |
| 9                                                  | 0.92            | 0.83, 1.02 | 0.95           | 0.84, 1.07 | 0.93            | 0.84, 1.03 | 0.93            | 0.83, 1.04 | 0.98 | 0.86, 1.12 | 1.02             | 0.90, 1.17 | 0.94              | 0.86, 1.03 |
| 10                                                 | 0.99            | 0.90, 1.10 | 0.97           | 0.85, 1.10 | 1.01            | 0.92, 1.12 | 0.97            | 0.87, 1.09 | 1.03 | 0.91, 1.18 | 1.07             | 0.94, 1.22 | 0.97              | 0.89, 1.06 |

SO<sub>2</sub>, sulfur dioxide; O<sub>3</sub>, ozone; NO<sub>x</sub>, nitrogen oxides; NO<sub>2</sub>, nitrogen dioxide; CO, carbon monoxide; PM<sub>10</sub>, particulate matter <10 µg/m<sup>3</sup>; PM<sub>2.5</sub>, fine particulate matter <2.5 µg/m<sup>3</sup>; FOR, fecundability odds ratio.

<sup>a</sup>Mean air pollution level during the cycle prior to the observed cycle (prior cycle) and the first 10 days of the observed cycle (proliferative phase).

<sup>b</sup>Mean daily air pollution level from 5 days before to 10 days following ovulation in the observed cycle. Excludes 60 participants who achieved pregnancy or were censored at the end of the entry cycle (ovulation date not assessed).
