# Supplementary material
Source: PubMed Central journal article supplement (PMC5850799)
Supplement: dex341suppl_table3.pdf [file dex341suppl_table3.pdf]

**Supplementary Table SIII Association of an interquartile increase in constituents of particulate matter and fecundability, unadjusted; the LIFE Study (2005–2009).**

|                                                    | AEC  |            | ANH <sub>4</sub> |            | ANO <sub>3</sub> |            | AOC  |            | ASO <sub>4</sub> |            |
|----------------------------------------------------|------|------------|------------------|------------|------------------|------------|------|------------|------------------|------------|
|                                                    | FOR  | 95% CI     | FOR              | 95% CI     | FOR              | 95% CI     | FOR  | 95% CI     | FOR              | 95% CI     |
| Time-varying cycle averages (n = 500) <sup>a</sup> |      |            |                  |            |                  |            |      |            |                  |            |
| Prior cycle                                        | 0.86 | 0.73, 1.03 | 0.99             | 0.86, 1.14 | 0.98             | 0.90, 1.06 | 0.96 | 0.84, 1.10 | 1.02             | 0.86, 1.21 |
| Proliferative phase                                | 0.92 | 0.78, 1.08 | 1.00             | 0.89, 1.11 | 0.96             | 0.89, 1.05 | 0.96 | 0.85, 1.08 | 1.06             | 0.94, 1.20 |
| Days from ovulation (n = 440) <sup>b</sup>         |      |            |                  |            |                  |            |      |            |                  |            |
| -5                                                 | 0.98 | 0.86, 1.13 | 1.04             | 0.97, 1.11 | 1.02             | 0.96, 1.08 | 1.01 | 0.91, 1.11 | 1.06             | 0.97, 1.15 |
| -4                                                 | 0.96 | 0.84, 1.10 | 1.04             | 0.97, 1.12 | 0.99             | 0.92, 1.06 | 0.99 | 0.89, 1.09 | 1.08             | 0.99, 1.18 |
| -3                                                 | 0.91 | 0.78, 1.04 | 1.06             | 0.99, 1.13 | 1.00             | 0.93, 1.07 | 0.99 | 0.89, 1.09 | 1.10             | 1.01, 1.19 |
| -2                                                 | 0.91 | 0.79, 1.05 | 1.07             | 1.00, 1.15 | 1.02             | 0.95, 1.09 | 0.97 | 0.88, 1.07 | 1.11             | 1.02, 1.21 |
| -1                                                 | 0.95 | 0.82, 1.10 | 1.01             | 0.93, 1.09 | 1.00             | 0.94, 1.07 | 1.03 | 0.93, 1.14 | 1.02             | 0.94, 1.12 |
| 0                                                  | 0.95 | 0.82, 1.09 | 0.95             | 0.88, 1.03 | 0.98             | 0.91, 1.05 | 1.04 | 0.94, 1.15 | 0.94             | 0.86, 1.03 |
| 1                                                  | 0.91 | 0.79, 1.05 | 1.00             | 0.92, 1.08 | 1.02             | 0.96, 1.09 | 1.05 | 0.95, 1.16 | 0.99             | 0.90, 1.09 |
| 2                                                  | 0.93 | 0.80, 1.08 | 1.01             | 0.94, 1.08 | 1.02             | 0.96, 1.08 | 1.01 | 0.91, 1.12 | 1.00             | 0.92, 1.10 |
| 3                                                  | 0.90 | 0.78, 1.04 | 1.00             | 0.93, 1.08 | 0.99             | 0.93, 1.05 | 0.97 | 0.87, 1.07 | 1.02             | 0.93, 1.12 |
| 4                                                  | 1.00 | 0.88, 1.15 | 1.00             | 0.93, 1.08 | 0.99             | 0.93, 1.05 | 1.03 | 0.93, 1.14 | 1.01             | 0.92, 1.10 |
| 5                                                  | 1.02 | 0.89, 1.17 | 1.03             | 0.96, 1.11 | 1.01             | 0.95, 1.07 | 1.01 | 0.92, 1.12 | 1.04             | 0.95, 1.14 |
| 6                                                  | 1.02 | 0.89, 1.17 | 1.06             | 0.98, 1.14 | 1.02             | 0.96, 1.09 | 1.02 | 0.92, 1.13 | 1.07             | 0.98, 1.18 |
| 7                                                  | 0.89 | 0.77, 1.03 | 1.02             | 0.95, 1.10 | 0.96             | 0.89, 1.03 | 0.98 | 0.89, 1.08 | 1.07             | 0.97, 1.17 |
| 8                                                  | 0.89 | 0.76, 1.03 | 0.98             | 0.91, 1.06 | 0.92             | 0.84, 1.00 | 0.99 | 0.89, 1.10 | 1.03             | 0.94, 1.12 |
| 9                                                  | 0.89 | 0.76, 1.04 | 0.97             | 0.89, 1.05 | 0.94             | 0.87, 1.01 | 0.96 | 0.87, 1.07 | 0.99             | 0.90, 1.09 |
| 10                                                 | 0.92 | 0.79, 1.07 | 0.98             | 0.90, 1.06 | 0.95             | 0.88, 1.02 | 0.97 | 0.87, 1.08 | 1.01             | 0.92, 1.10 |

AEC, elemental carbon; ANH<sub>4</sub>, ammonium; ANO<sub>3</sub>, nitrate; AOC, organic compounds; ASO<sub>4</sub>, sulfate.

<sup>a</sup>Mean air pollution level during the cycle prior to the observed cycle (prior cycle) and the first 10 days of the observed cycle (proliferative phase).

<sup>b</sup>Mean daily air pollution level from 5 days before to 10 days following ovulation in the observed cycle. Excludes 60 participants who achieved pregnancy or were censored at the end of the entry cycle (ovulation date not assessed).
