# Supplementary material
Source: PubMed Central journal article supplement (PMC5850799)
Supplement: dex341suppl_table4.pdf [file dex341suppl_table4.pdf]

**Supplementary Table SIV Association of particulate matter < 10 µm and time-to-pregnancy 6 days following ovulation after adjustment for a simulated baseline continuous confounder with a strength of association with pregnancy 2-, 3- and 4- times that of PM10 and a negative correlation with PM10 ranging from -0.1 to -0.9.**

| r <sup>b</sup> | OR = 1.46 <sup>a</sup> |                   | OR = 1.77 <sup>a</sup> |                   | OR = 2.14 <sup>a</sup> |                   |
|----------------|------------------------|-------------------|------------------------|-------------------|------------------------|-------------------|
|                | FOR                    | 95% CI            | FOR                    | 95% CI            | FOR                    | 95% CI            |
| -0.1           | <b>1.19</b>            | <b>1.05, 1.35</b> | <b>1.18</b>            | <b>1.04, 1.35</b> | <b>1.18</b>            | <b>1.03, 1.34</b> |
| -0.2           | <b>1.18</b>            | <b>1.03, 1.34</b> | <b>1.16</b>            | <b>1.02, 1.33</b> | <b>1.15</b>            | <b>1.01, 1.31</b> |
| -0.3           | <b>1.17</b>            | <b>1.02, 1.33</b> | 1.15                   | 1.00, 1.31        | 1.13                   | 0.99, 1.29        |
| -0.4           | <b>1.16</b>            | <b>1.01, 1.32</b> | 1.13                   | 0.99, 1.29        | 1.11                   | 0.96, 1.27        |
| -0.5           | 1.15                   | 1.00, 1.32        | 1.12                   | 0.97, 1.28        | 1.09                   | 0.95, 1.25        |
| -0.6           | 1.14                   | 0.99, 1.31        | 1.10                   | 0.95, 1.27        | 1.06                   | 0.92, 1.23        |
| -0.7           | 1.13                   | 0.98, 1.31        | 1.08                   | 0.93, 1.26        | 1.04                   | 0.90, 1.21        |
| -0.8           | 1.12                   | 0.96, 1.31        | 1.07                   | 0.92, 1.25        | 1.02                   | 0.88, 1.19        |
| -0.9           | 1.12                   | 0.96, 1.31        | 1.06                   | 0.90, 1.24        | 1.00                   | 0.85, 1.18        |

Bold text indicates  $p < 0.05$ .

<sup>a</sup>Odds ratio for the association between the simulated continuous confounder and pregnancy in multiples of the effect estimate (2-, 3- and 4-times) for the association of PM<sub>10</sub> and time-to-pregnancy in the unadjusted, single-pollutant model at 6 days following ovulation (OR 1.20, 95% CI 1.06, 1.37).

<sup>b</sup>Pearson's correlation coefficient for the association of the confounder and PM<sub>10</sub> in the first observed cycle.
