# Supplementary material
Source: PubMed Central journal article supplement (PMC5850799)
Supplement: dex341suppl_table5.pdf [file dex341suppl_table5.pdf]

**Supplementary Table SV Association of an interquartile increase in criteria air pollutants and fecundability, multipollutant model including imputed ovulation date for entry cycle, adjusted<sup>a</sup> (n = 500); the LIFE Study (2005–2009).**

| Days from ovulation | SO <sub>2</sub> |            | O <sub>3</sub> |            | NO <sub>x</sub> |            | CO   |            | PM <sub>10</sub> |            | PM <sub>2.5</sub> |            |
|---------------------|-----------------|------------|----------------|------------|-----------------|------------|------|------------|------------------|------------|-------------------|------------|
|                     | FOR             | 95% CI     | FOR            | 95% CI     | FOR             | 95% CI     | FOR  | 95% CI     | FOR              | 95% CI     | FOR               | 95% CI     |
| -5                  | 0.99            | 0.91, 1.09 | 0.87           | 0.77, 0.99 | 0.96            | 0.84, 1.10 | 1.14 | 0.92, 1.40 | 1.03             | 0.86, 1.24 | 1.00              | 0.89, 1.12 |
| -4                  | 0.96            | 0.87, 1.06 | 0.98           | 0.87, 1.11 | 0.99            | 0.86, 1.15 | 1.02 | 0.82, 1.26 | 0.93             | 0.77, 1.12 | 1.08              | 0.96, 1.21 |
| -3                  | 1.02            | 0.94, 1.10 | 1.01           | 0.89, 1.15 | 0.93            | 0.80, 1.08 | 0.99 | 0.80, 1.23 | 0.97             | 0.81, 1.17 | 1.07              | 0.95, 1.20 |
| -2                  | 0.99            | 0.91, 1.08 | 0.94           | 0.82, 1.07 | 0.94            | 0.82, 1.08 | 1.02 | 0.83, 1.25 | 0.99             | 0.82, 1.19 | 1.04              | 0.92, 1.17 |
| -1                  | 1.01            | 0.92, 1.11 | 0.88           | 0.78, 1.00 | 0.96            | 0.84, 1.10 | 1.13 | 0.94, 1.37 | 1.06             | 0.87, 1.28 | 0.98              | 0.87, 1.11 |
| 0                   | 1.09            | 1.00, 1.19 | 0.91           | 0.80, 1.03 | 1.01            | 0.88, 1.14 | 0.99 | 0.81, 1.21 | 1.16             | 0.95, 1.40 | 0.93              | 0.83, 1.05 |
| 1                   | 1.04            | 0.95, 1.14 | 0.96           | 0.85, 1.09 | 0.97            | 0.85, 1.11 | 0.99 | 0.80, 1.22 | 1.19             | 0.98, 1.43 | 0.94              | 0.84, 1.06 |
| 2                   | 0.99            | 0.91, 1.08 | 0.91           | 0.80, 1.03 | 1.03            | 0.89, 1.19 | 0.92 | 0.74, 1.15 | 1.13             | 0.94, 1.35 | 0.98              | 0.87, 1.10 |
| 3                   | 0.96            | 0.87, 1.06 | 0.90           | 0.80, 1.03 | 1.04            | 0.90, 1.20 | 0.85 | 0.69, 1.05 | 1.10             | 0.92, 1.32 | 0.96              | 0.85, 1.07 |
| 4                   | 1.06            | 0.96, 1.16 | 0.94           | 0.83, 1.06 | 1.05            | 0.92, 1.21 | 0.87 | 0.69, 1.08 | 1.17             | 0.97, 1.41 | 0.96              | 0.86, 1.08 |
| 5                   | 0.95            | 0.87, 1.04 | 0.96           | 0.85, 1.09 | 1.01            | 0.88, 1.16 | 1.01 | 0.81, 1.25 | 1.18             | 0.97, 1.42 | 0.99              | 0.88, 1.11 |
| 6                   | 1.01            | 0.93, 1.11 | 1.04           | 0.92, 1.18 | 1.02            | 0.89, 1.16 | 1.07 | 0.87, 1.32 | 1.22             | 1.01, 1.48 | 0.95              | 0.84, 1.07 |
| 7                   | 1.05            | 0.96, 1.14 | 0.96           | 0.84, 1.09 | 0.94            | 0.81, 1.08 | 1.03 | 0.84, 1.26 | 1.18             | 0.98, 1.42 | 0.94              | 0.84, 1.06 |
| 8                   | 1.02            | 0.94, 1.10 | 0.90           | 0.79, 1.02 | 0.88            | 0.76, 1.02 | 1.02 | 0.83, 1.26 | 1.14             | 0.95, 1.36 | 0.96              | 0.85, 1.08 |
| 9                   | 0.98            | 0.89, 1.08 | 0.93           | 0.82, 1.06 | 0.95            | 0.82, 1.10 | 1.01 | 0.82, 1.25 | 1.05             | 0.87, 1.26 | 0.93              | 0.83, 1.06 |
| 10                  | 0.99            | 0.89, 1.09 | 1.01           | 0.89, 1.15 | 1.03            | 0.90, 1.18 | 0.98 | 0.80, 1.21 | 1.05             | 0.87, 1.27 | 0.94              | 0.83, 1.06 |

SO<sub>2</sub>, sulfur dioxide; O<sub>3</sub>, ozone; NO<sub>x</sub>, nitrogen oxides; CO, carbon monoxide; PM<sub>10</sub>, particulate matter <10 µg/m<sup>3</sup>; PM<sub>2.5</sub>, fine particulate matter <2.5 µg/m<sup>3</sup>.

<sup>a</sup>Adjusts for multiple pollutants (SO<sub>2</sub>, O<sub>3</sub>, NO<sub>x</sub>, CO, PM<sub>10</sub> and PM<sub>2.5</sub>), study site (Michigan vs. Texas), age (years), race/ethnicity (Latino, non-Latino white, non-Latino black or other race/ethnicity), parity conditional on gravidity (nulligravous, gravous/nulliparous and parous), body mass index (kg/m<sup>2</sup>), education (high school or less, some college and college graduate or greater), household income (<\$40 000, \$40–<\$70 000, \$70 000–<\$100 000 and ≥\$100 000) and smoking status (serum cotinine ≥40.35 vs. <40.35 ng/mL).
