# Supplementary material
Source: PubMed Central journal article supplement (PMC5850799)
Supplement: dex341suppl_table6.pdf [file dex341suppl_table6.pdf]

**Supplementary Table SVI Association of an interquartile increase in constituents of particulate matter and fecundability, multipollutant model including imputed ovulation date for entry cycle, adjusted<sup>a</sup> (n = 500); the LIFE Study (2005–2009).**

| Days from ovulation | AEC  |            | ANH <sub>4</sub> |            | ANO <sub>3</sub> |            | AOC  |            | ASO <sub>4</sub> |            |
|---------------------|------|------------|------------------|------------|------------------|------------|------|------------|------------------|------------|
|                     | FOR  | 95% CI     | FOR              | 95% CI     | FOR              | 95% CI     | FOR  | 95% CI     | FOR              | 95% CI     |
| -5                  | 1.02 | 0.88, 1.20 | 1.06             | 0.96, 1.17 | 1.05             | 0.97, 1.14 | 1.02 | 0.91, 1.14 | 1.05             | 0.94, 1.18 |
| -4                  | 0.99 | 0.84, 1.17 | 1.06             | 0.96, 1.16 | 1.01             | 0.93, 1.10 | 0.98 | 0.88, 1.10 | 1.09             | 0.98, 1.23 |
| -3                  | 0.93 | 0.78, 1.10 | 1.10             | 1.00, 1.21 | 1.02             | 0.94, 1.11 | 0.99 | 0.88, 1.11 | 1.12             | 1.01, 1.25 |
| -2                  | 0.92 | 0.78, 1.08 | 1.10             | 1.00, 1.22 | 1.05             | 0.97, 1.14 | 0.96 | 0.86, 1.08 | 1.11             | 0.99, 1.23 |
| -1                  | 0.96 | 0.81, 1.14 | 1.02             | 0.92, 1.12 | 1.04             | 0.96, 1.13 | 1.04 | 0.92, 1.16 | 1.01             | 0.90, 1.13 |
| 0                   | 1.00 | 0.85, 1.19 | 0.95             | 0.85, 1.05 | 1.01             | 0.92, 1.10 | 1.08 | 0.97, 1.22 | 0.93             | 0.83, 1.05 |
| 1                   | 0.94 | 0.79, 1.13 | 1.00             | 0.90, 1.12 | 1.06             | 0.98, 1.15 | 1.07 | 0.95, 1.20 | 0.96             | 0.85, 1.09 |
| 2                   | 0.94 | 0.79, 1.12 | 1.02             | 0.92, 1.13 | 1.07             | 0.99, 1.15 | 1.00 | 0.89, 1.12 | 0.98             | 0.88, 1.10 |
| 3                   | 0.95 | 0.80, 1.13 | 1.06             | 0.96, 1.18 | 1.04             | 0.96, 1.13 | 0.99 | 0.88, 1.11 | 1.05             | 0.94, 1.18 |
| 4                   | 1.06 | 0.90, 1.25 | 1.00             | 0.90, 1.11 | 1.02             | 0.93, 1.11 | 1.04 | 0.92, 1.17 | 0.98             | 0.87, 1.10 |
| 5                   | 1.06 | 0.90, 1.25 | 1.05             | 0.95, 1.16 | 1.06             | 0.97, 1.15 | 1.01 | 0.90, 1.14 | 1.02             | 0.90, 1.15 |
| 6                   | 1.04 | 0.89, 1.21 | 1.08             | 0.98, 1.19 | 1.06             | 0.97, 1.15 | 1.00 | 0.89, 1.13 | 1.06             | 0.94, 1.20 |
| 7                   | 0.93 | 0.78, 1.10 | 1.07             | 0.97, 1.19 | 0.98             | 0.90, 1.07 | 0.98 | 0.88, 1.10 | 1.12             | 0.99, 1.26 |
| 8                   | 0.94 | 0.78, 1.12 | 1.01             | 0.91, 1.12 | 0.92             | 0.84, 1.02 | 1.02 | 0.91, 1.15 | 1.07             | 0.95, 1.20 |
| 9                   | 0.96 | 0.81, 1.15 | 1.02             | 0.92, 1.13 | 0.97             | 0.88, 1.06 | 1.01 | 0.90, 1.14 | 1.05             | 0.93, 1.18 |
| 10                  | 0.96 | 0.80, 1.14 | 1.00             | 0.90, 1.11 | 0.98             | 0.89, 1.07 | 0.98 | 0.87, 1.11 | 1.04             | 0.92, 1.17 |

AEC, elemental carbon; ANH<sub>4</sub>, ammonium; ANO<sub>3</sub>, nitrate; AOC, organic compounds; ASO<sub>4</sub>, sulfate.

<sup>a</sup>Adjusts for total fine particulates <2.5 microns, study site (Michigan vs. Texas), age (years), race/ethnicity (Latino, non-Latino white, non-Latino black or other race/ethnicity), parity conditional on gravidity (nulligravous, gravous/nulliparous and parous), body mass index (kg/m<sup>2</sup>), education (high school or less, some college and college graduate or greater), household income (<\$40 000, \$40–<\$70 000, \$70 000–<\$100 000 and ≥\$100 000) and smoking status (serum cotinine ≥40.35 vs. <40.35 ng/mL).
